# Supplementary material for: Energy transfer from self-trapped excitons to rare earth ions in Cs2ZrCl6perovskite variants
Source: Royal Society of Chemistry journal article supplement (doi:10.1039/d2tc04657a), 2022-12-09
Supplement: d2tc04657a1.pdf [file d2tc04657a1.pdf]

## Supporting Information

### Energy Transfer from Self-Trapped Excitons to Rare Earth in Cs<sub>2</sub>ZrCl<sub>6</sub> Perovskite Variant

Chen Fang,<sup>#a</sup> Jiakai Yang,<sup>#a</sup> Guojun Zhou,<sup>b</sup> Zhichao Zhang,<sup>c</sup> Yingjie Mao,<sup>a</sup> Xiangyan Yun,<sup>a</sup> Libo Liu,<sup>a</sup> Denghui Xu,<sup>a</sup> Xiong Li<sup>a</sup> and Jun Zhou<sup>\*a</sup>

<sup>a</sup> Department of physics, Beijing Technology and Business University, Beijing 100048, China.

<sup>b</sup> Laboratory of Magnetic Molecules and Magnetic Information Materials (Ministry of Education), School of Chemistry and Material Science, Shanxi Normal University, Taiyuan 030031, China

<sup>c</sup> Department of Energy Chemistry and Materials Engineering, ShanXi Institute of Energy, Jinzhong 030600, China

**Corresponding Author**

[jzhou1204@btbu.edu.cn](mailto:jzhou1204@btbu.edu.cn)

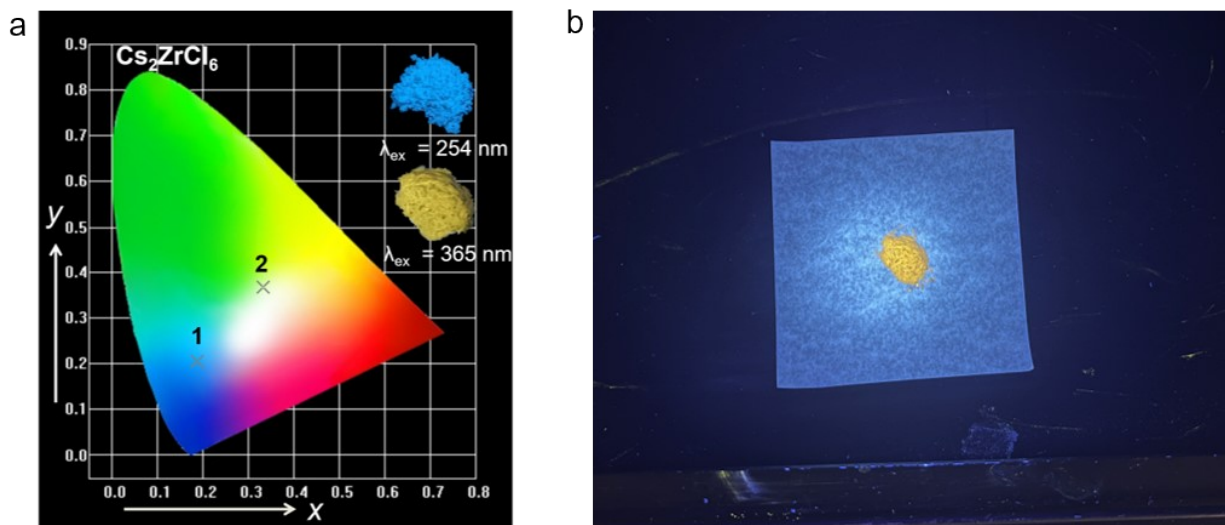

**Fig. S1.** (a) The CIE chromaticity diagram and digital photographs of  $\text{Cs}_2\text{ZrCl}_6$ . ( $\lambda_{\text{ex}} = 265 \text{ nm}$  and  $339 \text{ nm}$  corresponding to point 1 and 2, respectively). (b) The original photograph of  $\text{Cs}_2\text{ZrCl}_6$  excited by a  $365 \text{ nm}$  UV lamp.

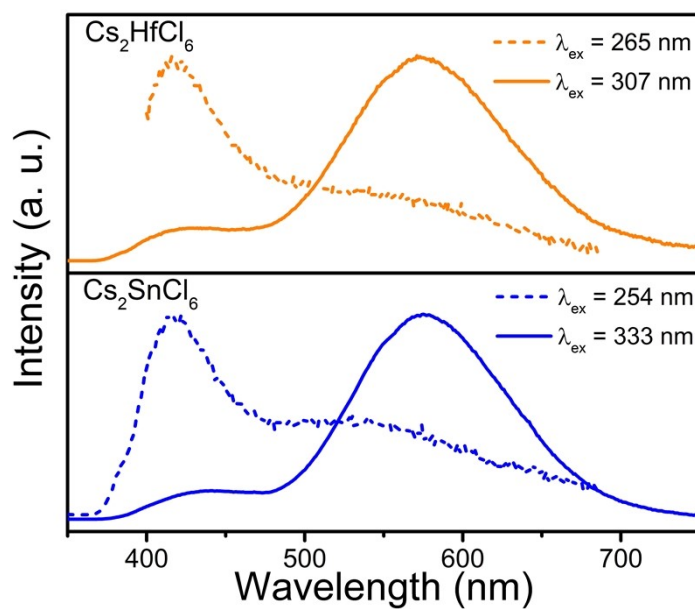

**Fig. S2.** The PL spectra of  $\text{Cs}_2\text{HfCl}_6$  and  $\text{Cs}_2\text{SnCl}_6$ .

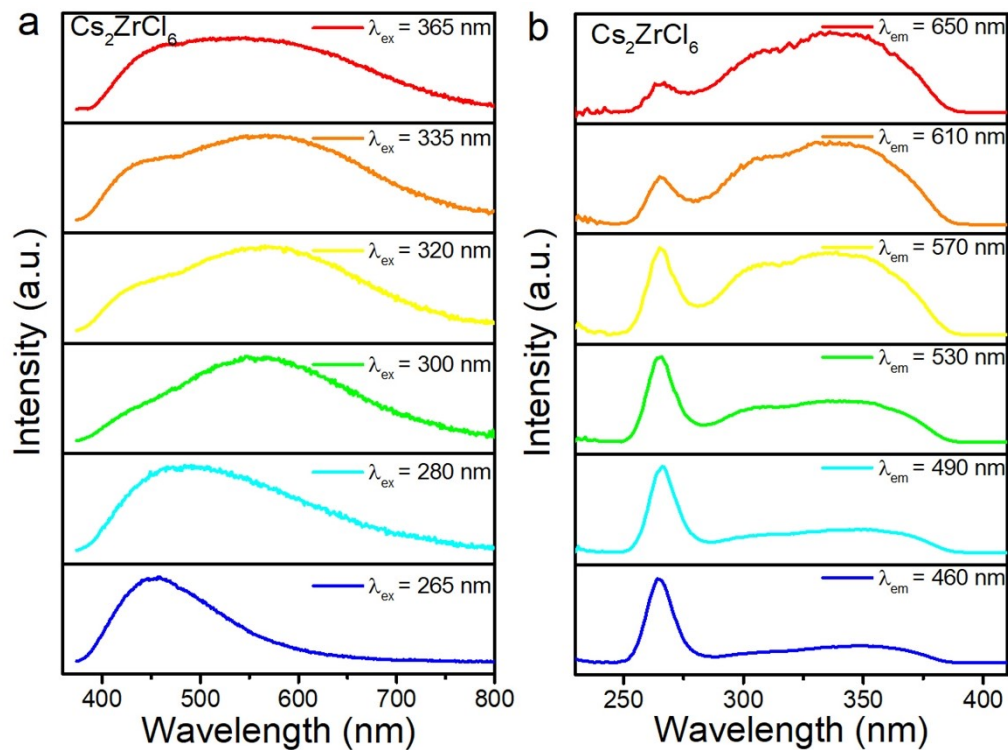

**Fig. S3.** Wavelength-dependent (a) PL and (b) PLE spectra of  $\text{Cs}_2\text{ZrCl}_6$ .

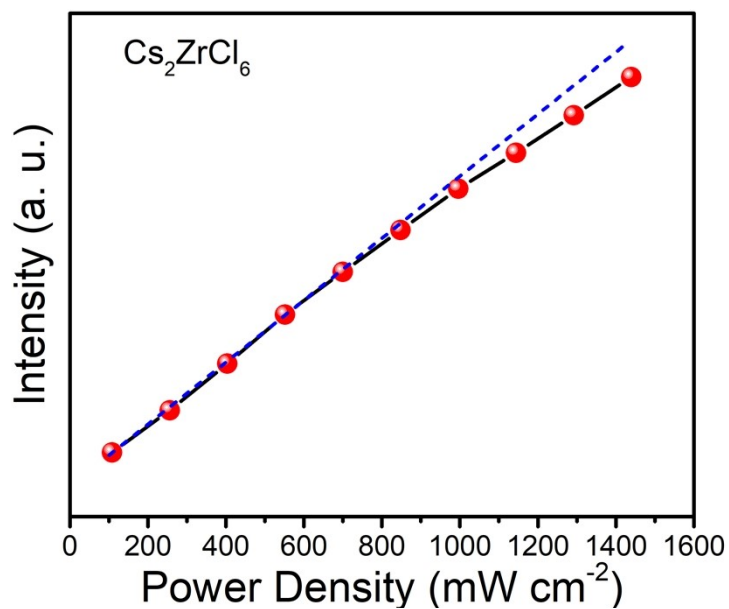

**Fig. S4.** Dependence of the emission intensity at the defect band of  $\text{Cs}_2\text{ZrCl}_6$  on the excitation intensity (108-1440  $\text{mW/cm}^2$ ) at 300 K ( $\lambda_{\text{ex}} = 375$  nm).

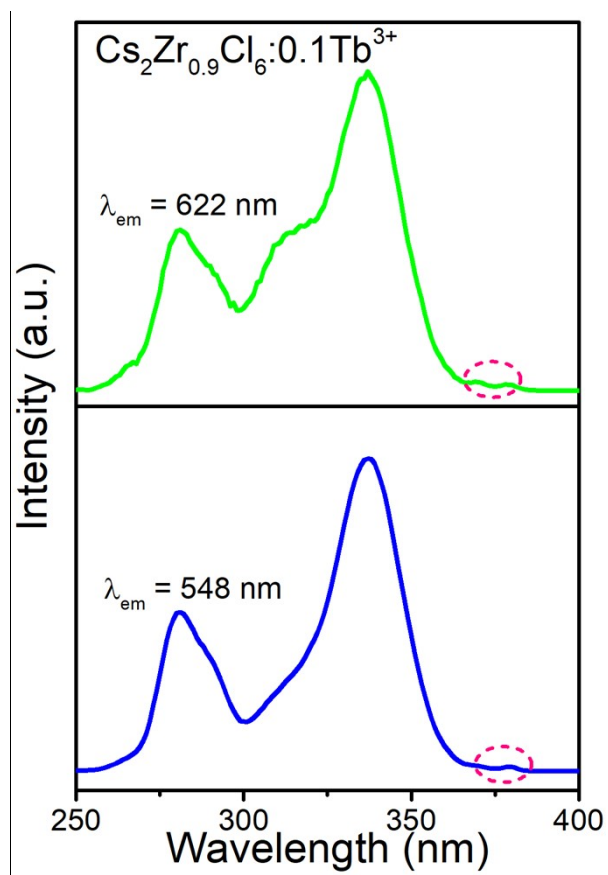

**Fig. S5.** The PLE spectra of  $\text{Tb}^{3+}$  monitored at 548 nm and 622 nm of  $\text{Cs}_2\text{Zr}_{0.9}\text{Cl}_6:0.1\text{Tb}^{3+}$ .

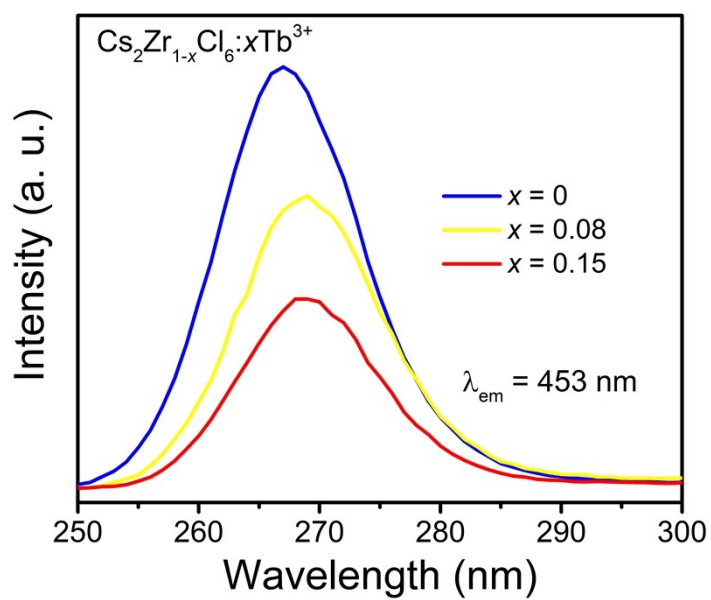

**Fig. S6.** The PLE spectra of STEs for  $\text{Cs}_2\text{Zr}_{1-x}\text{Cl}_6:x\text{Tb}^{3+}$ .

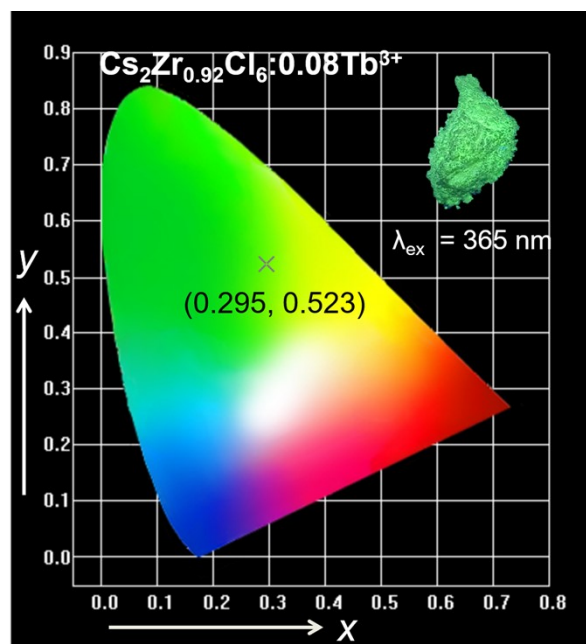

**Fig. S7.** The CIE chromaticity diagram and digital photograph of  $\text{Cs}_2\text{Zr}_{0.92}\text{Cl}_6:0.08\text{Tb}^{3+}$ . ( $\lambda_{\text{ex}} = 339 \text{ nm}$ ).

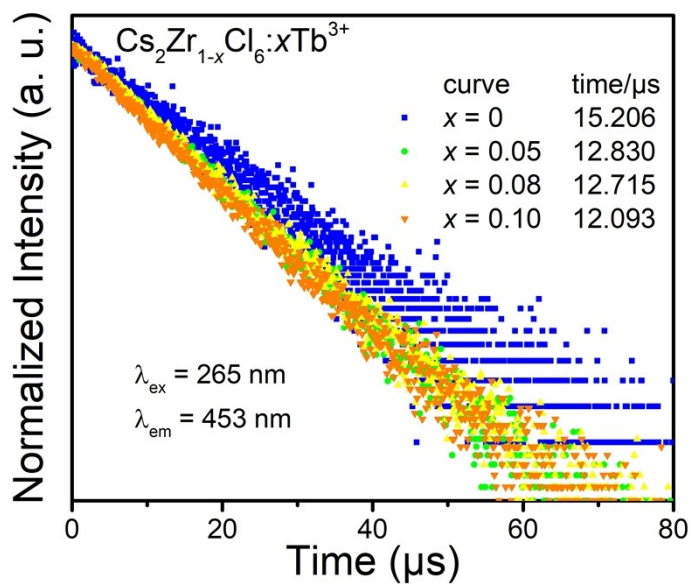

**Fig. S8.** Normalized PL decay curves of  $\text{Cs}_2\text{Zr}_{1-x}\text{Cl}_6:x\text{Tb}^{3+}$  ( $x = 0, 0.05, 0.08$ , and  $0.10$ ) excited at  $265 \text{ nm}$  and monitored at  $453 \text{ nm}$ .

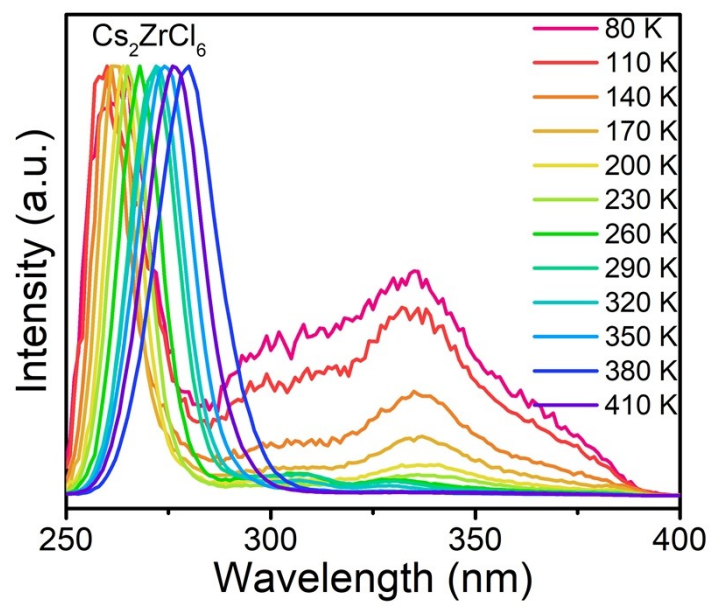

**Fig. S9.** Normalized temperature-dependent PLE spectra of  $\text{Cs}_2\text{ZrCl}_6$  monitored by STEs emission.
